# Supplementary material for: Taxonomic Identification and Antagonistic Mechanism of Streptomyces Luomodiensis Sp. Nov. Against Phytopathogenic Fungi
Source: Preprints.org preprint supplement (doi:10.20944/preprints202402.1660.v1), 2024-02-29
Supplement: Supplementary file 3 [file supplementary]

**Apendix A: Supplementary data**

**Taxonomic identification and antagonistic mechanism of *Streptomyces luomodiensis* sp. nov. against phytopathogenic fungi**

**Dengfeng Qia#, Qiao Liua#, Liangping Zoua, Miaoyi Zhang****a, Kai Li****a, Yankun Zhaoa Yufeng Chena, Junting Fenga, Dengbo Zhoua, Yongzan Weia, Wei Wanga*, Lu Zhangb*, Jianghui Xiea***

a Key Laboratory of Biology and Genetic Resources of Tropical Crops, Ministry of Agriculture, Institute of Tropical Bioscience and Biotechnology, Chinese Academy of Tropical Agricultural Sciences, Haikou, 571101, China

b Ministry of Education Key Laboratory for Ecology of Tropical Islands, Key Laboratory of Tropical Animal and Plant Ecology of Hainan Province, College of Life Sciences, Hainan Normal University, Haikou, Hainan 571158, China

#These authors have contributed equally to this work (co-first authors)

***Correspondence Authors:**

Dr. Jianghui Xie (xiejianghui@itbb.org.cn) Dr. Lu Zhang (luzhangtest@hainnu.edu.cn) Dr. Wei Wang ([wangweisys@ahau.edu.cn](mailto:wangweisys@ahau.edu.cn))

**Tables**

Table S1. Allele sequence accession numbers of *Streptomyces* used for the present study

| **Species** | **Strains** | **atpD** | **gyrB** | **recA** | **rpoB** | **trpB** |
| --- | --- | --- | --- | --- | --- | --- |
| *Streptomyces luomodiensis* | SCA4-21T | CP117522 | CP117522 | CP117522 | CP117522 | CP117522 |
| *Streptomyces iranensis* | HM 35T | MW197742.1 | MW197743.1 | MW197744.1 | MW197745.1 | MW197746.1 |
| *Streptomyces rapamycinicus* | NRRL B-5491T | NC_022785.1 | NC_022785.1 | NC_022785.1 | NC_022785.1 | NC_022785.1 |
| *Streptomyces hygroscopicus* subsp.  *hygroscopicus* | NBRC 13472T | NZ_BBOX01000262.1 | NZ_BBOX01000097.1 | NZ_BBOX01000200.1 | NZ_BBOX01000138.1 | NZ_BBOX01000120.1 |
| *Streptomyces demainii* | NRRL B-1478  (DSM 41600)T | FJ406182.1 | FJ406238.1 | FJ406294.1 | FJ406349.1 | FJ406405.1 |
| *Streptomyces melanosporofaciens* | DSM 40318T | NZ_FNST01000002.1 | NZ_FNST01000002.1 | NZ_FNST01000002.1 | NZ_FNST01000002.1 | NZ_FNST01000002.1 |
| *Streptomyces antimycoticus* | NBRC 12839T | NZ_BJHV01000001.1 | NZ_BJHV01000001.1 | NZ_BJHV01000001.1 | NZ_BJHV01000001.1 | NZ_BJHV01000001.1 |
| *Streptomyces himastatinicus* | ATCC 53653T | NZ_GG657754.1 | NZ_GG657754.1 | NZ_GG657754.1 | NZ_GG657754.1 | NZ_GG657754.1 |
| *Streptomyces lydicamycinicus* | NBRC 110027T | BBNO01000001.1 | BBNO01000002.1 | BBNO01000008.1 | BBNO01000005.1 | BBNO01000012.1 |
| *Streptomyces caniferus* | NBRC 15389T | NZ_BLIN01000002.1 | NZ_BLIN01000005.1 | NZ_BLIN01000002.1 | NZ_BLIN01000005.1 | NZ_BLIN01000005.1 |
| *Streptomyces platensis* | JCM 4662 (DSM 40041)T | NZ_MIGA01000003.1 | NZ_MIGA01000008.1 | NZ_MIGA01000021.1 | NZ_MIGA01000026.1 | NZ_MIGA01000017.1 |
| *Streptomyces celluloflavu* | NRRL B-2493T | NZ_JOEL01000012.1 | NZ_JOEL01000017.1 | NZ_JOEL01000056.1 | NZ_JOEL01000011.1 | NZ_JOEL01000004.1 |
| *Streptomyces morookaense* | LMG 20074 (DSM  40503)T | NZ_JABBXF010000065.1 | NZ_JABBXF010000006.1 | NZ_JABBXF010000043.1 | NZ_JABBXF010000039.1 | NZ_JABBXF010000021.1 |
| *Streptomyces lacticiproducens* | GIMN4.001 (NRRL B-  24800)T | KT384614.1 | KT384963.1 | KT385313.1 | KT388934.1 | KT389283.1 |
| *Streptomyces palmae* | MU-AB 204 (JCM  31289)T | MH534869.1 | MH534870.1 | MH534871.1 | MH534872.1 | MH534873.1 |
| *Streptomyces cuspidosporus* | NBRC 12378 (NRRL B-  5620)T | KT384533.1 | KT384882.1 | KT385230.1 | KT388852.1 | KT389202.1 |
| *Streptomyces sparsogenes* | ATCC 25498T | NZ_MAXF01000096.1 | NZ_MAXF01000061.1 | NZ_MAXF01000107.1 | NZ_MAXF01000083.1 | NZ_MAXF01000016.1 |

Table S2. Physiological and biochemical characteristics of strain SCA4-21T

| **Characteristics** | **Result** | **Characteristics** | **Result** |
| --- | --- | --- | --- |
| **Morphological** |  | **Antibiotic sensitivity (μg/slice)** |  |
| Aerial mycelium | Branched | Clindamycin (2) | S |
| Spore chain shape | Spiral | Chloramphenicol (30) | S |
| Spore shape | Cylindrical | Furazolidone (300) | R |
| Spore surface | Shrinkage | Compound sulfamethoxazole (1.25) | R |
| **Biochemical** |  | Polymyxin B (300 IU/slice) | R |
| Urease test | + | Vancomycin (30) | R |
| Twain-20 | + | Penicillin (10 U/slice) | S |
| Twain-40 | - | Erythromycin (15) | R |
| Twain-60 | - | Minocycline (30) | R |
| Gelatin liquefaction | - | Kanamycin (30) | R |
| Starch hydrolysis | + | Gentamicin (10) | R |
| Nitrate reduction | - | Cefepime (75) | S |
| Degradation of cellulose | - | Ceftriaxone (30) | R |
| Melanoid pigment | + | Cefotaxime (30) | S |
| H2S production | - | Cefuroxime (30) | R |
| Siderophores | + | Cefamandole (30) | S |
| **Physiological** |  | Midecamycin (30) | S |
| pH range for growth | 6-9 | Carbenicillin (100) | S |
| Optimum pH for growth | 7 | Ampicillin (10) | S |
| NaCl tolerance (%) | 1-3 | Benzylpenicillin (1) | S |
| Optimum NaCl toleranc (%) | 2.00 | Piperacillin (100) | S |

Note: Note: “+” means positive; “-” means negative; S, sensitivity; R, resistance.

Table S3. The carbon and nitrogen utilization of strain SCA4-21T

| **Characteristic** | **Results** |
| --- | --- |
| *Carbon source utilization* |  |
| D- mannose | +++ |
| D- trehalose | ++ |
| L- arabinose | - |
| Sorbose | +++ |
| D- fructose | ++ |
| α- Lactose | + |
| D- ribose | +++ |
| Mannitol | ++ |
| Xylan | + |
| Raffinose | - |
| Inositol | - |
| *Nitrogen source utilization* |  |
| L- phenylalanine | + |
| L- asparagine | ++ |
| Anhydrous inositol | - |
| L- methionine | + |
| L- valine | +++ |
| L- histidine | + |
| L- glutamic acid | - |
| L- tryptophan | ++ |
| L- tyrosine | - |
| D- cellobiose | +++ |
| L- arginine | - |
| L- hydroxyproline | + |
| L- cysteine | + |
| Glycine | - |

Note: “+++” represented that the strain grew well; “+ +” represented the general growth of the strain; “+” represented that the strain can grow; ‘-’ represented the strain cannot grow.

Table S4. COG functional cluster of predicted genes in strain SCA4-21T

| **COG functional categories** | **Type** | **Gene**  **No.** | **% of Gene**  **No**. |
| --- | --- | --- | --- |
| **Information storage and processing** |  | **1489** | **19.7%** |
| RNA processing and modification | A | 1 |  |
| Translation, ribosomal structure and biogenesis | J | 296 |  |
| Transcription | K | 1032 |  |
| Replication, recombination and repair | L | 160 |  |
| **Metabolism** |  | **3578** | **47.4%** |
| Energy production and conversion | C | 441 |  |
| Amino acid transport and metabolism | E | 589 |  |
| Nucleotide transport and metabolism | F | 138 |  |
| Carbohydrate transport and metabolism | G | 772 |  |
| Coenzyme transport and metabolism | H | 484 |  |
| Lipid transport and metabolism | I | 568 |  |
| Inorganic ion transport and metabolism | P | 309 |  |
| Secondary metabolites biosynthesis, transport and  catabolism | Q | 277 |  |
| **Cellular processes and signaling** |  | **1528** | **20.2%** |
| Cell cycle control, cell division, chromosome  partitioning | D | 86 |  |
| Cell wall/membrane/envelope biogenesis | M | 310 |  |
| Cell motility | N | 20 |  |
| Posttranslational modification, protein turnover,  chaperones | O | 255 |  |
| Signal transduction mechanisms | T | 484 |  |
| Intracellular trafficking, secretion, and vesicular  transport | U | 53 |  |
| Defense mechanisms | V | 212 |  |
| Extracellular structures | W | 14 |  |
| Cytoskeleton | Z | 5 |  |
| Mobilome: prophages, transposons | X | 89 |  |
| **Poorly characterized** |  | **953** | **12.6%** |
| General function prediction only | R | 794 |  |
| Function unknown | S | 159 |  |

Table S5. Family and gene ID of strain SCA4-21T CAZymes

| **Family** | **Genes No.** | **Gene ID** |
| --- | --- | --- |
| **Auxiliary Activities（AA）** | **36** |  |
| AA1 | 2 | gene0968, gene2542 |
| AA2 | 1 | gene6975 |
| AA3 | 11 | gene0094, gene0190, gene1355, gene1407, gene1519, gene2924, gene3679, gene3692, gene4873, gene6812, gene7011 |
| AA3_2 | 3 | gene1526, gene3647, gene6518 |
| AA4 | 3 | gene3323, gene7037, gene7935 |
| AA5 | 1 | gene3264 |
| AA6 | 5 | gene0059, gene0636, gene7628, gene7709, gene8112 |
| AA7 | 3 | gene1000, gene4505, gene6047 |
| AA10 | 7 | gene0624, gene1675, gene1780, gene2049, gene3257, gene5523, gene6167 |
| **Carbohydrate-Binding Modules (CBM)** | **6** |  |
| CBM2 | 1 | gene2825 |
| CBM13 | 2 | gene5170, gene7842 |
| CBM35 | 1 | gene3777 |
| CBM66 | 2 | gene6392, gene7306 |
| **Carbohydrate Esterases (CE)** | **74** |  |
| CE1 | 24 | gene0176, gene0177, gene0396, gene0570, gene0767, gene1439, gene1563, gene1656, gene1898, gene2671, gene3543, gene3567, gene3714, gene3914, gene4651, gene4833, gene5174, gene5350, gene5357, gene7311, gene7724, gene7864, gene7996, gene8217 |
| CE2 | 2 | gene0498, gene0681 |
| CE3 | 6 | gene1102, gene2034, gene3277, gene3491, gene6265, gene6586 |
| CE4 | 7 | gene2216, gene4634, gene4840, gene6952, gene7425, gene7656, gene8060 |
| CE7 | 5 | gene0562, gene4053, gene7026, gene7877, gene8194 |
| CE8 | 1 | gene0661 |
| CE9 | 1 | gene3774 |
| CE10 | 21 | gene0003, gene0081, gene0199, gene0305, gene0476, gene1047, gene1138, gene1175, gene1685, gene1712, gene3597, gene4022, gene4408, gene5315, gene5675, gene6198, gene6272, gene6316, gene6361, gene7673, gene7840 |
| CE12 | 2 | gene2218, gene7487 |
| CE14 | 4 | gene1650, gene5187, gene5317, gene6111 |
| CE15 | 1 | gene7746 |
| **Glycoside Hydrolases (GH)** | **155** |  |
| GH1 | 2 | gene1587, gene3177 |
| GH2 | 8 | gene0100, gene0974, gene6895, gene6996, gene7224, gene7387, gene8209, gene8222 |
| GH3 | 4 | gene3119, gene5445, gene6959, gene8067 |
| GH4 | 3 | gene3020, gene6988, gene0953 |
| GH5_1 | 1 | gene3947 |
| GH5_8 | 1 | gene7006 |
| GH5_18 | 1 | gene8068 |
| GH5_19 | 1 | gene6958 |
| GH5_40 | 1 | gene3171 |
| GH5_43 | 1 | gene0548 |
| GH6 | 7 | gene0172, gene1998, gene3172, gene3265, gene3949, gene5764, gene6217 |
| GH8 | 1 | gene3962 |
| GH9 | 1 | gene7050 |
| GH10 | 2 | gene1734, gene6953 |
| GH11 | 1 | gene4355 |
| GH12 | 1 | gene5893 |
| GH13_3 | 1 | gene5658 |
| GH13_9 | 1 | gene5655 |
| GH13_10 | 1 | gene6165 |
| GH13_11 | 2 | gene5690, gene6169 |
| GH13_13 | 1 | gene2526 |
| GH13_16 | 1 | gene5657 |
| GH13_26 | 1 | gene6168 |
| GH13_30 | 2 | gene2532, gene7053 |
| GH13_32 | 1 | gene2527 |
| GH15 | 3 | gene2098, gene2175, gene7351 |
| GH16 | 4 | gene0917, gene5654, gene6893, gene7651 |
| GH18 | 10 | gene1565, gene1638, gene2872, gene2907, gene3179, gene5217, gene5218, gene5259, gene5648, gene6873 |
| GH19 | 1 | gene6597 |
| GH20 | 3 | gene3148, gene3345, gene3624 |
| GH23 | 3 | gene1828, gene2670, gene4503 |
| GH25 | 3 | gene4119, gene5503, gene5697 |
| GH26 | 1 | gene0108 |
| GH27 | 1 | gene0179 |
| GH30_5 | 2 | gene4557, gene4926 |
| GH30_7 | 1 | gene2753 |
| GH31 | 2 | gene1301, gene3371 |
| GH33 | 4 | gene1036, gene2559, gene6377, gene7662 |
| GH35 | 1 | gene7807 |
| GH36 | 3 | gene0101, gene0376, gene6585 |
| GH42 | 1 | gene5892 |
| GH43 | 1 | gene1515 |
| GH43_3 | 1 | gene7226 |
| GH43_5 | 1 | gene0563 |
| GH43_10 | 1 | gene7070 |
| GH43_24 | 1 | gene0553 |
| GH43_26 | 2 | gene0554, gene6994 |
| GH43_34 | 2 | gene0507, gene0555 |
| GH44 | 1 | gene7198 |
| GH46 | 1 | gene6600 |
| GH48 | 1 | gene3170 |
| GH51 | 3 | gene2748, gene6815, gene6831 |
| GH54 | 1 | gene0178 |
| GH55 | 1 | gene0843 |
| GH62 | 2 | gene0173, gene1735 |
| GH63 | 1 | gene2853 |
| GH64 | 2 | gene2099, gene7246 |
| GH65 | 2 | gene0539, gene0972 |
| GH67 | 1 | gene0266 |
| GH74 | 1 | gene1467 |
| GH76 | 2 | gene6995, gene7247 |
| GH77 | 1 | gene3010 |
| GH78 | 2 | gene0515, gene2612 |
| GH85 | 1 | gene8066 |
| GH87 | 4 | gene1641, gene7052, gene7828, gene7829 |
| GH89 | 1 | gene2524 |
| GH92 | 4 | gene0931, gene6109, gene6112, gene7344 |
| GH93 | 3 | gene2646, gene7412, gene8210 |
| GH95 | 1 | gene0583 |
| GH106 | 2 | gene0514, gene0516 |
| GH109 | 4 | gene0602, gene2576 |
| GH113 | 1 | gene7311 |
| GH114 | 2 | gene2359, gene6983 |
| GH127 | 2 | gene0557, gene8140 |
| GH128 | 1 | gene7213 |
| GH135 | 1 | gene5362 |
| GH145 | 1 | gene6910 |
| GH146 | 3 | gene0517, gene0552, gene8139 |
| GH152 | 1 | gene7212 |
| GH154 | 2 | gene1022, gene7690 |
| **Glycosyl Transferases (GT)** | **65** |  |
| GT1 | 5 | gene0005, gene1180, gene3194, gene3883, gene6414 |
| GT2_Glycos_transf_2 | 12 | gene0098, gene1210, gene1211, gene3460, gene3581, gene3863, gene4092, gene6148, gene6560, gene6827, gene6879, gene7922 |
| GT2_Glyco_tranf_2_3 | 11 | gene0027, gene0030, gene1219, gene1383, gene1997, gene2580, gene3613, gene3952, gene6830, gene6852, gene7308 |
| GT4 | 15 | gene0925, gene1215, gene1216, gene1333, gene1334, gene1987, gene1996, gene2081, Gene2100, gene2448, gene2614, gene3874, gene6502, gene6711, gene7874 |
| GT5 | 1 | gene1807 |
| GT9 | 3 | gene1212, gene1217, gene6836 |
| GT20 | 1 | gene3769 |
| GT28 | 3 | gene2400, gene5130, gene7422 |
| GT35 | 1 | gene5662 |
| GT39 | 1 | gene5075 |
| GT41 | 2 | gene2299, gene3007 |
| GT76 | 2 | gene2068, gene4393 |
| GT81 | 1 | gene3768 |
| GT83 | 4 | gene0158, gene3953, gene4091, gene7362 |
| GT87 | 3 | gene2632, gene4908, gene7459 |
| **Polysaccharide Lyases (PL)** | **12** |  |
| PL1 | 1 | gene7071 |
| PL1_5 | 1 | gene0392 |
| PL1_6 | 1 | gene2217 |
| PL3_4 | 1 | gene5660 |
| PL7_3 | 2 | gene7568, gene7569 |
| PL8 | 1 | gene7236 |
| PL9 | 1 | gene6336 |
| PL9_3 | 1 | gene2215 |
| PL11 | 1 | gene5661 |
| PL26 | 1 | gene6698 |
| PL31 | 1 | gene2302 |
| **Total No.** | **348** |  |

Figures


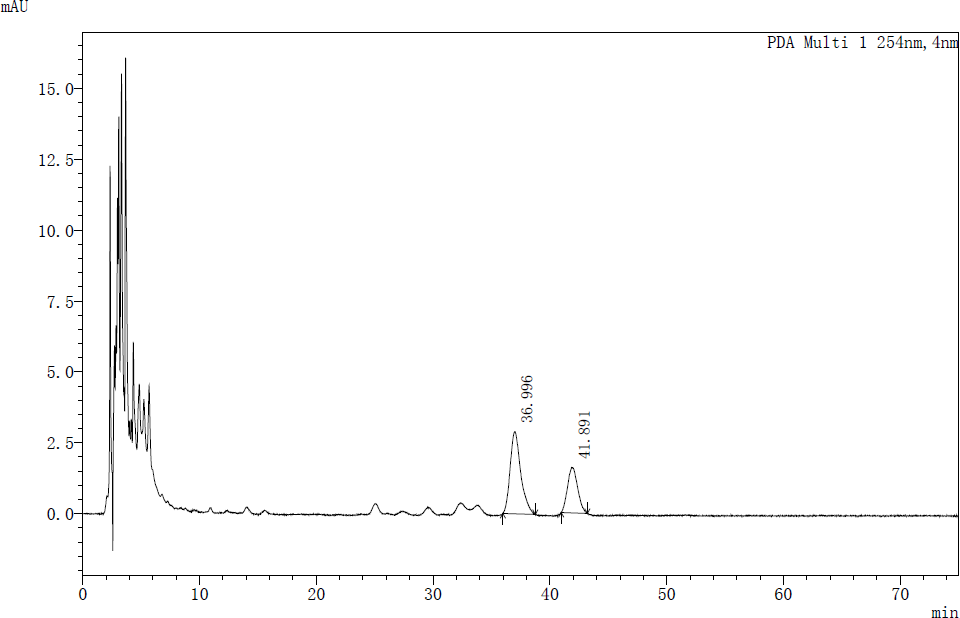


Fig. S1. The analysis of high-performance liquid chromatography (Shimadzu LabSolutions) showed that strain SCA4-21T mainly contained dominant menaquinones composed of MK9 (H8) (65.50%) and MK10 (H2) (34.50%).


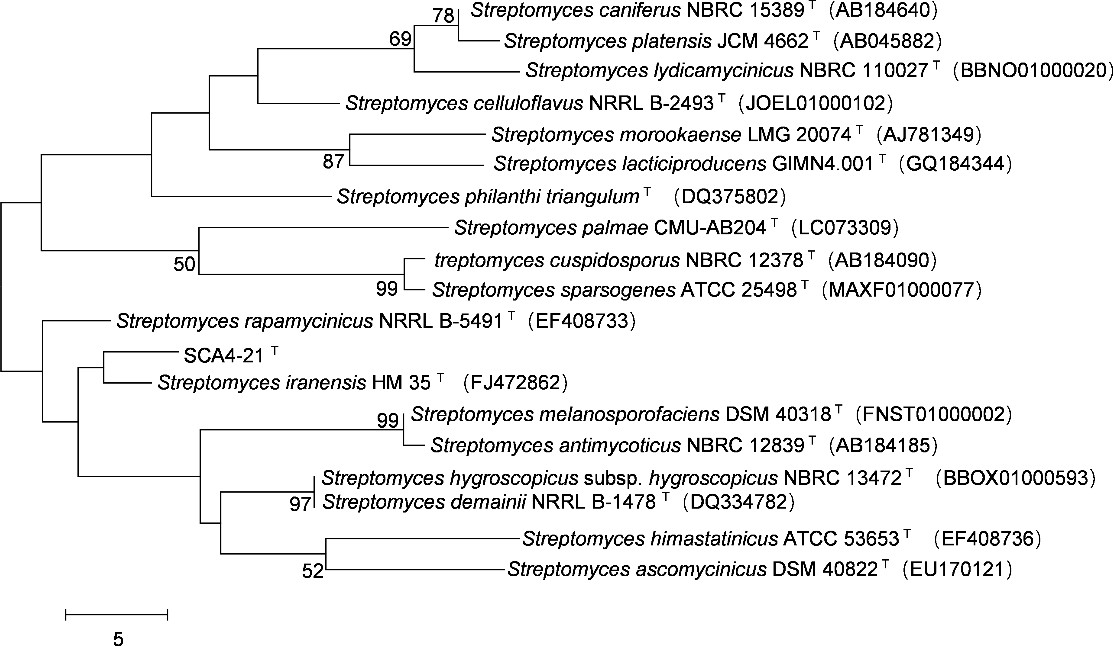


Fig. S2. Maximum-parsimony tree based on 16S rRNA gene showing position of strain SCA4-21T among its phylogenetic neighbors in the genus *Streptomyces*. Bootstrap percentages (based on 1000 replications) were shown at branching points. Bar, 5 base changes between nodes.


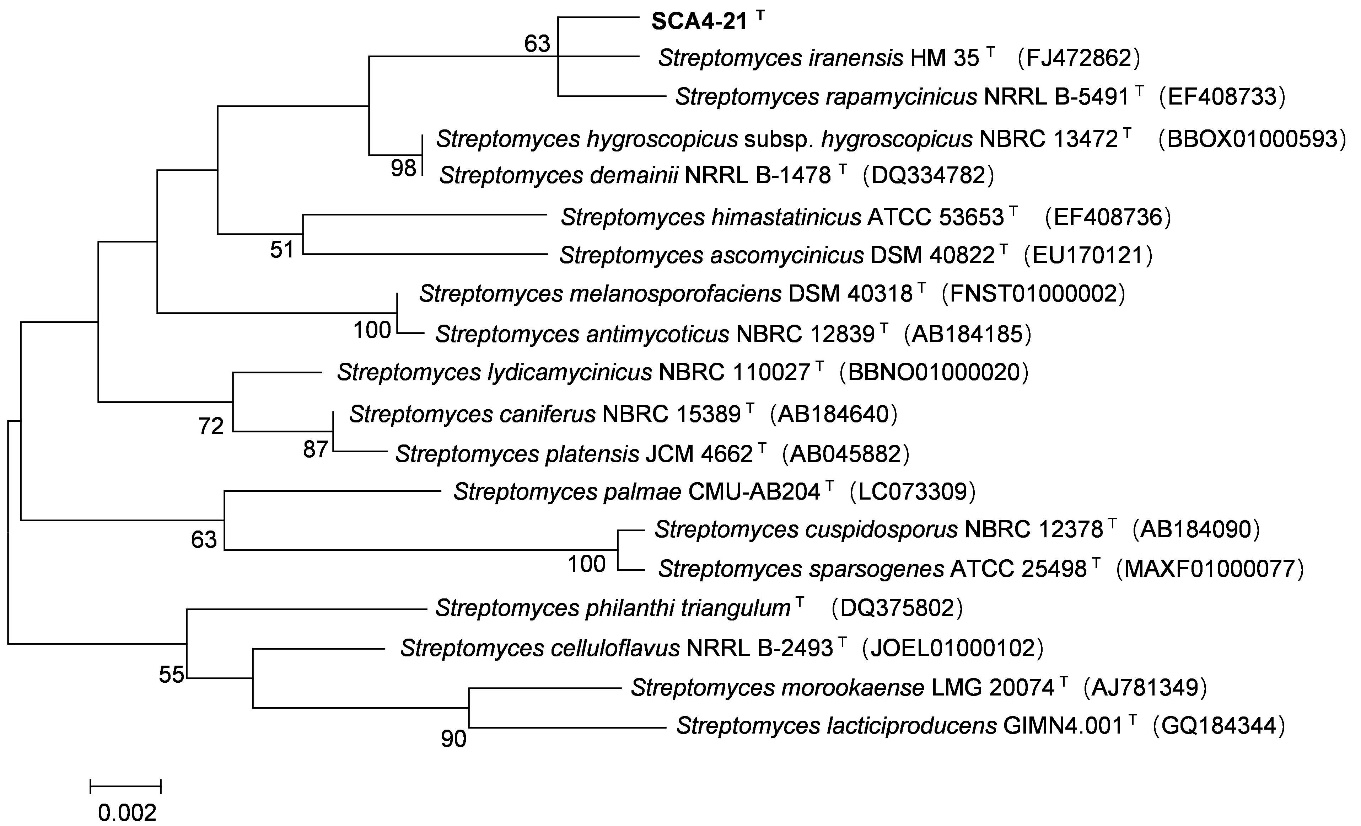


Fig. S3. Maximum-likelihood tree based on 16S rRNA gene showing position of strain SCA4- 21T among its phylogenetic neighbors in the genus *Streptomyces*. Bootstrap percentages (based on 1000 replications) were shown at branching points. Bar, 0.002 substitutions per nucleotide position.


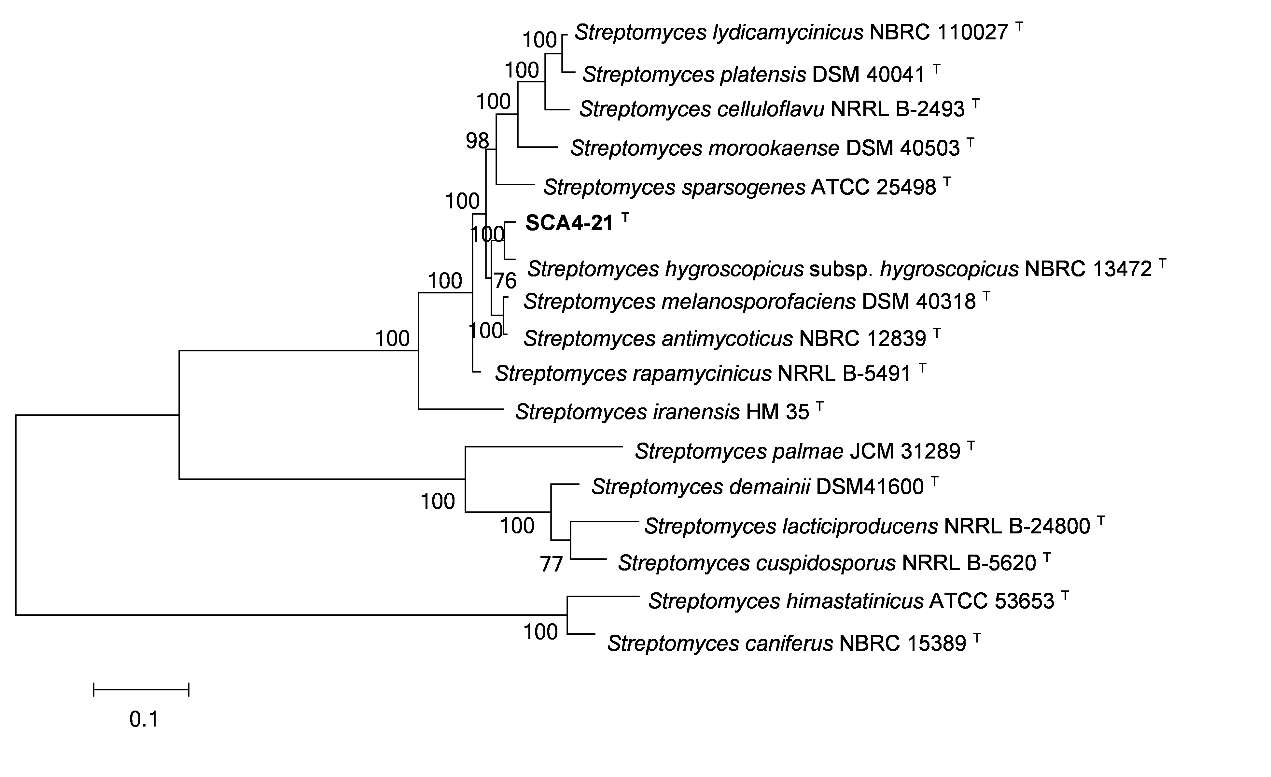


Fig. S4. Maximum-likelihood tree based on five housekeeping genes (*atpD*, *gyrB*, *recA*, *rpoB*, and *trpB*) showing position of strain SCA4-21T among its phylogenetic neighbors in the genus *Streptomyces*. Bootstrap percentages (based on 1000 replications) were shown at branching points. Bar, 0.1 substitutions per nucleotide position.


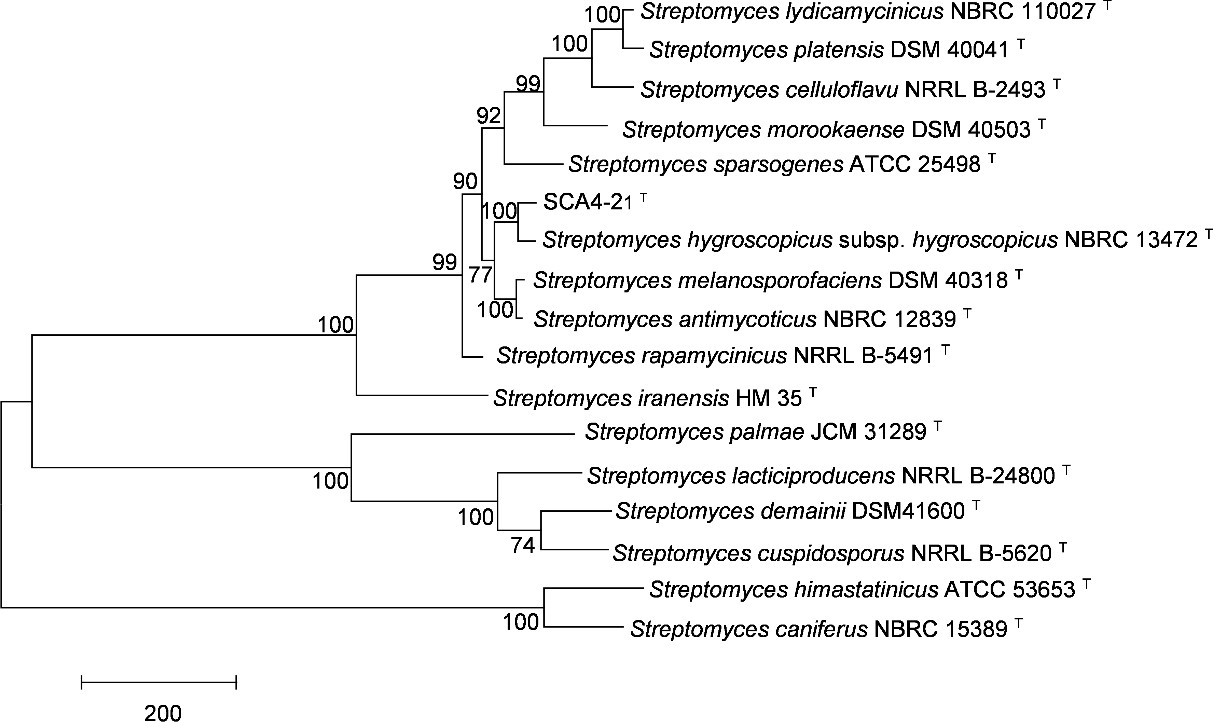


Fig. S5. Maximum-parsimony tree based on five housekeeping genes (*atpD*, *gyrB*, *recA*, *rpoB*, and *trpB*) showing position of strain SCA4-21T among its phylogenetic neighbors in the genus *Streptomyces*. Bootstrap percentages (based on 1000 replications) were shown at branching points. Bar, Bar, 200 base changes between nodes.
